# Supplementary material for: Enzymatic and transcriptomic analysis reveals the essential role of carbohydrate metabolism in freesia (Freesia hybrida) corm formation
Source: PeerJ. 2021 Mar 19;9:e11078. doi: 10.7717/peerj.11078 (PMC7983857; doi:10.7717/peerj.11078)
Supplement: Supplemental Information 2 [file peerj-09-11078-s013.xlsx]

## Sheet: Figure1
Number	Day	Starch (mg/g·FW)	SE	β-AMY (μg/min/g·FW)	SE	SBE (%)	SE	AGPase(μg/min/g·FW)	SE
1	60	30.9364	0.344343	273.122	2.50833	8.26446	0.00349607	80.9988	2.07913
2	70	35.1549	0.164487	329.022	1.08983	8.06452	0.0010653	82.5771	2.14943
3	80	38.3188	0.830668	404.272	0.47403	10.6007	0.00138972	99.1938	2.2423
4	90	37.7329	0.42889	408.93	2.03494	16.4706	0.00283241	151.927	4.46114
5	100	38.6703	0.35201	353.926	1.46654	17.4216	0.00345485	98.4705	2.65035
6	110	40.7795	0.317808	357.688	2.50833	14.8289	0.00282265	101.728	2.7875
7	120	51.4429	0.711827	498.334	1.17487	20.2335	0.00261807	150.717	6.19096
8	130	58.8253	0.695857	321.676	1.25417	26.2238	0.00198479	160.692	3.33243
9	140	56.9504	1.51288	384.026	0.645995	27.6978	0.00414446	112.769	1.46103
10	150	55.427	1.11599	343.355	3.52462	30.5755	0.0040672	159.434	6.6936
11	160	59.8799	3.98365	443.33	0.821045	30.8824	0.00520974	176.219	4.35934
12	170	60.2314	1.23471	466.98	1.88764	34.507	0.00875865	210.714	2.06918
13	180	63.9812	2.07914	467.338	2.78141	30.9091	0.00709616	204.245	1.25002
14	190	65.0358	1.6488	452.109	1.97083	35.0877	0.00252717	236.655	1.57351

## Sheet: Figure2
	Day	Sucrose (mg/g·FW)	SE	Soluble sugars (mg/g·FW)	SE	SPS(μg/min/g·FW)	SE	SuSy(μg/min/g·FW)	SE	NI(μg/min/g·FW)	SE	AI(μg/min/g·FW)	SE
1	60	1.19804	0.189931	3.14103	0.0144107	317.008	4.56955	705.092	6.11605	88.4693	2.30787	64.2027	0.661398
2	70	1.3022	0.0922663	4.59981	0.0680119	355.001	4.12361	622.056	3.98557	94.7093	2.01425	81.2587	1.27279
3	80	1.48448	0.192362	4.65318	0.0603216	347.581	3.71919	453.836	5.85932	100.949	2.56814	81.744	1.456
4	90	1.27616	0.281129	4.49307	0.078612	432.176	4.99335	433.077	5.16192	108.299	2.93502	103.168	1.25376
5	100	1.9532	0.107254	4.56423	0.111544	642.03	7.57338	602.729	1.89391	124.939	2.78371	69.9573	0.454649
6	110	2.13548	0.256378	5.43594	0.0666724	614.722	6.46913	690.776	5.01081	123.552	1.44107	104.208	0.523455
7	120	2.29172	0.138004	6.69903	0.168425	641.14	3.70733	1006.46	6.11605	136.171	2.45326	123.275	1.68695
8	130	2.81252	0.151433	6.59229	0.0765105	597.804	5.44896	955.633	3.28034	139.221	1.18477	122.165	1.02134
9	140	2.50004	0.379082	9.61659	0.0115701	614.129	1.80551	1032.94	7.54174	165.013	3.12539	111.003	1.99988
10	150	2.52608	0.332831	9.45648	0.0946393	489.463	1.65265	1002.88	5.68172	180.821	0.99994	99.7707	0.346667
11	160	3.17708	0.211986	10.6128	0.108011	559.216	2.24097	647.826	7.97114	170.56	2.31619	92.144	1.10063
12	170	2.89064	0.217996	11.0576	0.074686	558.92	5.63966	709.387	6.11605	144.213	1.10933	81.3973	0.616248
13	180	3.95828	0.421951	10.9508	0.0933691	595.132	6.55033	685.765	4.35422	142.272	2.5418	82.0907	0.978067
14	190	4.427	0.410357	10.2392	0.113738	639.953	3.71919	659.279	5.4044	126.187	2.40578	72.2453	0.781347

## Sheet: Figure6
c87855.graph_c0	INV2			c93394.graph_c2	SuSy			c78179.graph_c0	SBE4			c93923.graph_c0	APGase5			c91035.graph_c1	SPS1			c62599.graph_c1	β-AMY1
Day	rt-PCR	RNA-seq		Day	rt-PCR	RNA-seq		Day	rt-PCR	RNA-seq		Day	rt-PCR	RNA-seq		Day	rt-PCR	RNA-seq		Day	rt-PCR	RNA-seq
60	0.311848	5.71		60	38.9245	55.73		60	0.00783611	0		60	22.3625	188.08		60	0.0425706	0.87		60	0.820907	1.42
90	0.283133	8.36		90	12.1186	132.84		90	0.0106235	0.06		90	7.17714	218.1		90	0.0190399	1.27		90	2.15828	0.4
120	0.461324	46.68		120	21.6764	44.37		120	0.0607791	0		120	5.40376	530.46		120	0.0133784	0.39		120	12.8301	1
190	0.462804	15.58		190	9.81759	67.68		190	6.16637	3.33		190	68.0888	297.84		190	0.0226749	2.19		190	4.68032	0.78

## Sheet: q-RT-PCR
				gene	actin	∆Ct	2^-∆Ct	Mean	SE
60 D	Q1.1	INV2(c87855.graph_c0)		27.282	24.695	2.58704	0.166426	0.138839	0.0240325
				27.6383	24.6085	3.02978	0.122446
				27.7434	24.7736	2.96981	0.127643
		SuSy(c93394.graph_c2)		20.0031	24.695	-4.69185	25.8457	22.7905	4.50843
				20.47	24.6085	-4.13853	17.6125
				20.1348	24.7736	-4.63884	24.9133
		SBE4(c78179.graph_c0)		31.4146	24.695	6.71959	0.00948862	0.00974372	0.000427758
				31.2185	24.6085	6.60998	0.0102376
				31.4907	24.7736	6.7171	0.00950498
		AGPase5(c93923.graph_c0)		20.0955	24.695	-4.59946	24.2423	22.8397	3.86039
				20.4011	24.6085	-4.20743	18.4741
				20.0842	24.7736	-4.68945	25.8026
		SPS1(c91035.graph_c1)		29.1518	24.695	4.4568	0.0455375	0.0621815	0.0201233
				28.7551	24.6085	4.14659	0.0564613
				28.3378	24.7736	3.56413	0.0845456
		β-AMY1(c62599.graph_c1)		24.1311	24.695	-0.563859	1.47822	1.30294	0.22635
				24.1405	24.6085	-0.468025	1.38321
				24.7068	24.7736	-0.0668069	1.0474
	Q1.2	INV2(c87855.graph_c0)		25.1314	23.4005	1.73086	0.301273	0.305026	0.0842961
				24.8832	23.5289	1.35426	0.391136
				25.3076	23.1405	2.16703	0.222669
		SuSy(c93394.graph_c2)		18.0342	23.4005	-5.3663	41.2493	36.555	4.26178
				18.3797	23.5289	-5.14921	35.4868
				18.0993	23.1405	-5.04128	32.929
		SBE4(c78179.graph_c0)		31.0338	23.4005	7.63331	0.00503667	0.00511818	0.000847322
				30.909	23.5289	7.38003	0.00600331
				30.9971	23.1405	7.85657	0.00431456
		AGPase5(c93923.graph_c0)		19.2733	23.4005	-4.12715	17.4742	18.2413	3.73603
				19.0499	23.5289	-4.47906	22.3013
				19.2386	23.1405	-3.90191	14.9483
		SPS1(c91035.graph_c1)		28.4807	23.4005	5.08021	0.0295599	0.0310447	0.00355706
				28.3612	23.5289	4.83224	0.0351036
				28.2749	23.1405	5.13438	0.0284706
		β-AMY1(c62599.graph_c1)		24.3238	23.4005	0.923336	0.527288	0.561679	0.144428
				24.0025	23.5289	0.473535	0.720198
				24.333	23.1405	1.19248	0.43755
	Q1.3	INV2(c87855.graph_c0)		25.5024	23.7091	1.79328	0.288515	0.49168	0.32164
				24.9226	24.7092	0.213383	0.862512
				25.7308	24.1049	1.62588	0.324013
		SuSy(c93394.graph_c2)		18.2168	23.7091	-5.49227	45.0129	57.4281	14.726
				18.5056	24.7092	-6.20356	73.6981
				18.3615	24.1049	-5.74344	53.5733
		SBE4(c78179.graph_c0)		31.1351	23.7091	7.42603	0.0058149	0.00864641	0.00437025
				30.901	24.7092	6.19183	0.0136796
				31.3826	24.1049	7.27767	0.00644472
		AGPase5(c93923.graph_c0)		19.2853	23.7091	-4.42376	21.4627	26.0065	3.93976
				19.8778	24.7092	-4.83145	28.4715
				19.2932	24.1049	-4.81174	28.0852
		SPS1(c91035.graph_c1)		29.376	23.7091	5.66692	0.0196828	0.0344855	0.0144719
				29.072	24.7092	4.36283	0.0486022
				28.9344	24.1049	4.82945	0.0351716
		β-AMY1(c62599.graph_c1)		26.2255	23.7091	2.51642	0.174776	0.5981	0.51152
				24.487	24.7092	-0.222166	1.16648
				25.2472	24.1049	1.14229	0.453041
90 D	Q2.1	INV2(c87855.graph_c0)		24.4904	22.5991	1.89127	0.269569	0.261745	0.0362013
				24.5343	22.7652	1.76909	0.293394
				24.2852	22.1156	2.16961	0.222271
		SuSy(c93394.graph_c2)		18.6712	22.5991	-3.92795	15.2205	12.3231	2.79864
				19.1666	22.7652	-3.59859	12.1139
				18.8473	22.1156	-3.26828	9.63499
		SBE4(c78179.graph_c0)		29.2747	22.5991	6.67556	0.00978262	0.00910506	0.00214688
				29.2939	22.7652	6.52864	0.0108314
				29.3369	22.1156	7.22138	0.00670114
		AGPase5(c93923.graph_c0)		19.6024	22.5991	-2.99668	7.98161	6.74196	1.85565
				19.8325	22.7652	-2.93276	7.6357
				19.9112	22.1156	-2.20432	4.60857
		SPS1(c91035.graph_c1)		28.0293	22.5991	5.43015	0.0231933	0.0174362	0.00698875
				28.4489	22.7652	5.68371	0.0194551
				28.8093	22.1156	6.69372	0.00966026
		β-AMY1(c62599.graph_c1)		22.3943	22.5991	-0.204876	1.15259	1.73381	1.07927
				21.1903	22.7652	-1.57489	2.97912
				22.0183	22.1156	-0.0972211	1.06971
	Q2.2	INV2(c87855.graph_c0)		25.8579	23.4583	2.39956	0.189523	0.239238	0.0758097
				25.6567	23.3469	2.30972	0.201699
				25.0149	23.4	1.61488	0.326493
		SuSy(c93394.graph_c2)		19.9521	23.4583	-3.50622	11.3626	9.69557	1.5655
				20.3014	23.3469	-3.04555	8.2566
				20.157	23.4	-3.24299	9.46752
		SBE4(c78179.graph_c0)			23.4583	-23.4583	1.15255e+07	0.00926445	0.00130528
				29.964	23.3469	6.61707	0.0101874
				30.3055	23.4	6.90548	0.00834147
		AGPase5(c93923.graph_c0)		20.6607	23.4583	-2.79761	6.95286	5.9299	1.03821
				21.0609	23.3469	-2.28602	4.87709
				20.8247	23.4	-2.57526	5.95976
		SPS1(c91035.graph_c1)		29.1816	23.4583	5.72328	0.0189287	0.0172753	0.00545553
				29.8293	23.3469	6.48237	0.0111844
				28.9253	23.4	5.5253	0.0217129
		β-AMY1(c62599.graph_c1)		23.0088	23.4583	-0.449508	1.36557	2.02055	0.568016
				22.134	23.3469	-1.21295	2.31811
				22.1503	23.4	-1.24973	2.37797
	Q2.3	INV2(c87855.graph_c0)		25.1959	23.4197	1.77623	0.291945	0.348416	0.0536982
				24.823	23.3268	1.49624	0.354475
				24.7932	23.467	1.32616	0.398827
		SuSy(c93394.graph_c2)		19.3412	23.4197	-4.07846	16.8942	14.337	2.29738
				19.689	23.3268	-3.63777	12.4473
				19.6941	23.467	-3.77288	13.6694
		SBE4(c78179.graph_c0)		29.7795	23.4197	6.35974	0.0121766	0.0135009	0.00255489
				29.7221	23.3268	6.39532	0.01188
				29.3931	23.467	5.92612	0.016446
		AGPase5(c93923.graph_c0)		20.2771	23.4197	-3.1426	8.83116	8.85956	2.16524
				20.5807	23.3268	-2.74602	6.70865
				20.0025	23.467	-3.46452	11.0389
		SPS1(c91035.graph_c1)		28.151	23.4197	4.73133	0.0376467	0.022408	0.0145684
				30.1852	23.3268	6.8584	0.00861819
				29.0433	23.467	5.57627	0.0209592
		β-AMY1(c62599.graph_c1)		22.618	23.4197	-0.801702	1.74316	2.72048	0.889135
				21.527	23.3268	-1.79972	3.48152
				21.9128	23.467	-1.55423	2.93676
120 D	Q3.1	INV2(c87855.graph_c0)		26.725	25.0948	1.63027	0.323028	0.501482	0.261619
				27.0945	26.7758	0.318682	0.801802
				27.1363	25.7389	1.39739	0.379614
		SuSy(c93394.graph_c2)		21.1764	25.0948	-3.9184	15.1201	23.8573	13.6312
				21.4697	26.7758	-5.30612	39.5641
				21.661	25.7389	-4.0779	16.8877
		SBE4(c78179.graph_c0)		29.4056	25.0948	4.31088	0.0503845	0.0820367	0.0682391
				29.4164	26.7758	2.64067	0.160354
				30.5602	25.7389	4.82128	0.0353713
		AGPase5(c93923.graph_c0)		23.3117	25.0948	-1.7831	3.44164	7.12716	3.26786
				23.5021	26.7758	-3.27368	9.67109
				22.6913	25.7389	-3.04767	8.26874
		SPS1(c91035.graph_c1)		30.5822	25.0948	5.48741	0.0222908	0.0248122	0.00767608
				31.6784	26.7758	4.90264	0.0334318
				31.4787	25.7389	5.73975	0.0187139
		β-AMY1(c62599.graph_c1)		22.6601	25.0948	-2.43467	5.40641	22.7339	21.7119
				21.2185	26.7758	-5.55732	47.0892
				21.7657	25.7389	-3.97325	15.706
	Q3.2	INV2(c87855.graph_c0)		26.1405	24.5197	1.62073	0.32517	0.414769	0.141434
				25.709	24.9177	0.791317	0.577816
				26.1009	24.5501	1.5508	0.341321
		SuSy(c93394.graph_c2)		20.7545	24.5197	-3.76525	13.5973	17.0418	3.09275
				20.6263	24.9177	-4.29136	19.5806
				20.3844	24.5501	-4.1657	17.9473
		SBE4(c78179.graph_c0)		29.0075	24.5197	4.48776	0.0445708	0.0449474	0.0151632
				28.9695	24.9177	4.05181	0.0602955
				29.6101	24.5501	5.06005	0.029976
		AGPase5(c93923.graph_c0)		22.5854	24.5197	-1.93432	3.82199	3.65998	0.172842
				23.038	24.9177	-1.87967	3.67992
				22.7518	24.5501	-1.79827	3.47803
		SPS1(c91035.graph_c1)		31.1752	24.5197	6.65541	0.00992021	0.00839254	0.00335797
				31.4619	24.9177	6.54422	0.0107151
				32.3324	24.5501	7.78235	0.00454234
		β-AMY1(c62599.graph_c1)		22.0785	24.5197	-2.44127	5.43119	7.76953	2.99684
				21.439	24.9177	-3.47869	11.1478
				21.7995	24.5501	-2.75052	6.7296
	Q3.3	INV2(c87855.graph_c0)		27.2146	24.7532	2.46141	0.181569	0.467722	0.27511
				25.9268	25.4733	0.453505	0.730266
				25.4838	24.4586	1.02523	0.491332
		SuSy(c93394.graph_c2)		20.4856	24.7532	-4.26758	19.2606	24.1301	12.4594
				20.2145	25.4733	-5.25885	38.2888
				20.5671	24.4586	-3.8915	14.8409
		SBE4(c78179.graph_c0)		29.1139	24.7532	4.36074	0.0486729	0.0553531	0.0267163
				29.0335	25.4733	3.56021	0.0847757
				29.3971	24.4586	4.9385	0.0326109
		AGPase5(c93923.graph_c0)		22.2503	24.7532	-2.50286	5.66808	5.42414	1.32958
				22.7476	25.4733	-2.72571	6.61486
				22.4624	24.4586	-1.9962	3.98948
		SPS1(c91035.graph_c1)		32.0881	24.7532	7.33488	0.00619416	0.00693065	0.00285571
				32.1053	25.4733	6.63201	0.0100825
				32.2495	24.4586	7.79096	0.00451532
		β-AMY1(c62599.graph_c1)		21.7841	24.7532	-2.96911	7.8305	7.98683	2.9223
				22.016	25.4733	-3.45735	10.9842
				22.0952	24.4586	-2.3634	5.14583
190 D	Q4.1	INV2(c87855.graph_c0)		28.2638	25.0896	3.17427	0.110777	0.23633	0.119218
				28.1279	26.605	1.52285	0.347998
				28.1769	26.1782	1.99877	0.250213
		SuSy(c93394.graph_c2)		23.7745	25.0896	-1.31503	2.48807	4.81294	3.50378
				23.4605	26.605	-3.14452	8.8429
				24.5422	26.1782	-1.63592	3.10786
		SBE4(c78179.graph_c0)		24.4759	25.0896	-0.613646	1.53012	2.64916	1.13198
				24.6814	26.605	-1.92359	3.79366
				24.7866	26.1782	-1.39161	2.62371
		AGPase5(c93923.graph_c0)		21.4841	25.0896	-3.60551	12.1721	29.6327	15.2149
				21.2814	26.605	-5.32365	40.0478
				20.9813	26.1782	-5.19685	36.6783
		SPS1(c91035.graph_c1)		32.5144	25.0896	7.42486	0.00581963	0.00988265	0.00493196
				32.6288	26.605	6.02373	0.01537
				33.0636	26.1782	6.88542	0.00845829
		β-AMY1(c62599.graph_c1)		23.0945	25.0896	-1.99504	3.98628	3.02652	0.990927
				24.9792	26.605	-1.62581	3.08614
				25.173	26.1782	-1.00513	2.00712
	Q4.2	INV2(c87855.graph_c0)		29.0301	26.223	2.80712	0.142881	0.661664	0.461805
				28.0798	28.1195	-0.0396747	1.02788
				28.3756	28.0791	0.296494	0.814229
		SuSy(c93394.graph_c2)		23.7996	26.223	-2.42334	5.36412	11.7378	5.54371
				24.1709	28.1195	-3.94854	15.4394
				24.2301	28.0791	-3.84898	14.4098
		SBE4(c78179.graph_c0)		24.4014	26.223	-1.82152	3.53454	9.37781	5.06411
				24.5218	28.1195	-3.59767	12.1062
				24.4361	28.0791	-3.64301	12.4927
		AGPase5(c93923.graph_c0)		21.1649	26.223	-5.05811	33.3153	94.3726	54.245
				21.3019	28.1195	-6.81758	112.796
				20.981	28.0791	-7.0981	137.006
		SPS1(c91035.graph_c1)		32.4507	26.223	6.22772	0.0133435	0.0303661	0.0197113
				32.3859	28.1195	4.2664	0.0519621
				33.356	28.0791	5.2769	0.0257926
		β-AMY1(c62599.graph_c1)		24.3525	26.223	-1.87042	3.65639	3.75618	0.326188
				26.0766	28.1195	-2.04285	4.1206
				26.2752	28.0791	-1.80386	3.49154
	Q4.3	INV2(c87855.graph_c0)		27.7793	26.5228	1.25653	0.41855	0.490418	0.0873227
				27.6208	26.5164	1.10438	0.465103
				27.8007	27.0336	0.76709	0.587602
		SuSy(c93394.graph_c2)		23.0504	26.5228	-3.47243	11.0996	12.902	2.00117
				22.8667	26.5164	-3.64973	12.551
				23.1214	27.0336	-3.91222	15.0555
		SBE4(c78179.graph_c0)		24.1872	26.5228	-2.33564	5.04773	6.47215	1.72612
				23.937	26.5164	-2.57942	5.97699
				23.9647	27.0336	-3.06897	8.39174
		AGPase5(c93923.graph_c0)		20.4193	26.5228	-6.10353	68.7617	80.261	41.2155
				20.9923	26.5164	-5.52407	46.0163
				20.0563	27.0336	-6.97734	126.005
		SPS1(c91035.graph_c1)		31.9045	26.5228	5.38168	0.0239858	0.027776	0.00502054
				31.4174	26.5164	4.90099	0.03347
				32.3061	27.0336	5.27245	0.0258723
		β-AMY1(c62599.graph_c1)		23.7479	26.5228	-2.7749	6.8443	7.25828	1.48631
				23.9259	26.5164	-2.59045	6.02285
				23.8786	27.0336	-3.15505	8.9077
